# Supplementary material for: H3O2–, O22– and O2˙– bridging ligands in cobalt(iii) complexes of an acyclic phenolate-hinged dinucleating ligandElectronic supplementary information (ESI) available: Fig. S1: Raman spectra of [Co2(bpbp)(µ-O2)(µ-CH3CO2)]2+ (top) and the superoxo-bridged complex [Co2(bpbp)(µ-O2)(µ-CH3CO2)]3+ (bottom). Fig. S2: ESI-MS spectra of the peroxo bridged [Co2(bpbp)(µ-O2)(µ-CH3CO2)]2+. Fig. S3: ESI-MS spectrum of the superoxo bridged [Co2(bpbp)(µ-O2)(µ-CH3CO2)]3+. See http://www.rsc.org/suppdata/dt/b2/b210091f/
Source: Royal Society of Chemistry journal article supplement (doi:10.1039/b210091f), 2003-03-03
Supplement: b210091f.pdf [file b210091f.pdf]

## Supplementary Information

$\text{H}_3\text{O}_2^-$ ,  $\text{O}_2^{2-}$  and  $\text{O}_2^{\bullet-}$  bridging ligands in cobalt(III) complexes of an acyclic phenolate-hinged dinucleating ligand.

Morten Ghiladi, Jonnes T. Gomez, Alan Hazell, Pauli Kofod,\* Jan Lumtscher and Christine J. McKenzie\*

Figure S1. Raman spectra of  $[\text{Co}_2(\text{bpbp})(\mu\text{-O}_2)(\mu\text{-CH}_3\text{CO}_2)]^{2+}$  (top) and the superoxo-bridged complex  $[\text{Co}_2(\text{bpbp})(\mu\text{-O}_2)(\mu\text{-CH}_3\text{CO}_2)]^{3+}$  (bottom).

Figure S2. ESI-MS spectra of the peroxo bridged  $[\text{Co}_2(\text{bpbp})(\mu\text{-O}_2)(\mu\text{-CH}_3\text{CO}_2)]^{2+}$ . The Capillary temperature was 150 °C. (a) Tube lens 80 V. (b) Tube lens 40 V. Under the milder conditions in (b) the parent peroxo complex is readily observed. As source conditions are made increasingly more harsh the ion with  $m/z$  390.0 loses intensity.

Figure S3. ESI-MS spectrum of the superoxo bridged  $[\text{Co}_2(\text{bpbp})(\mu\text{-O}_2)(\mu\text{-CH}_3\text{CO}_2)]^{3+}$ .

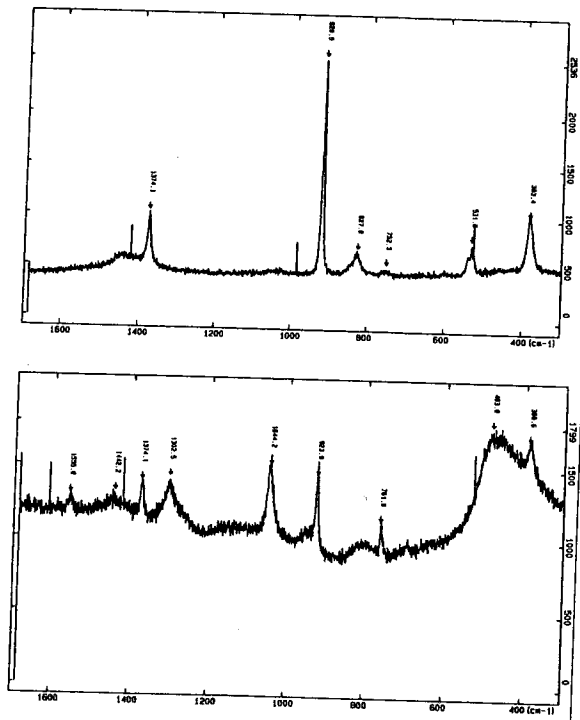

Figure S1

Figure S2

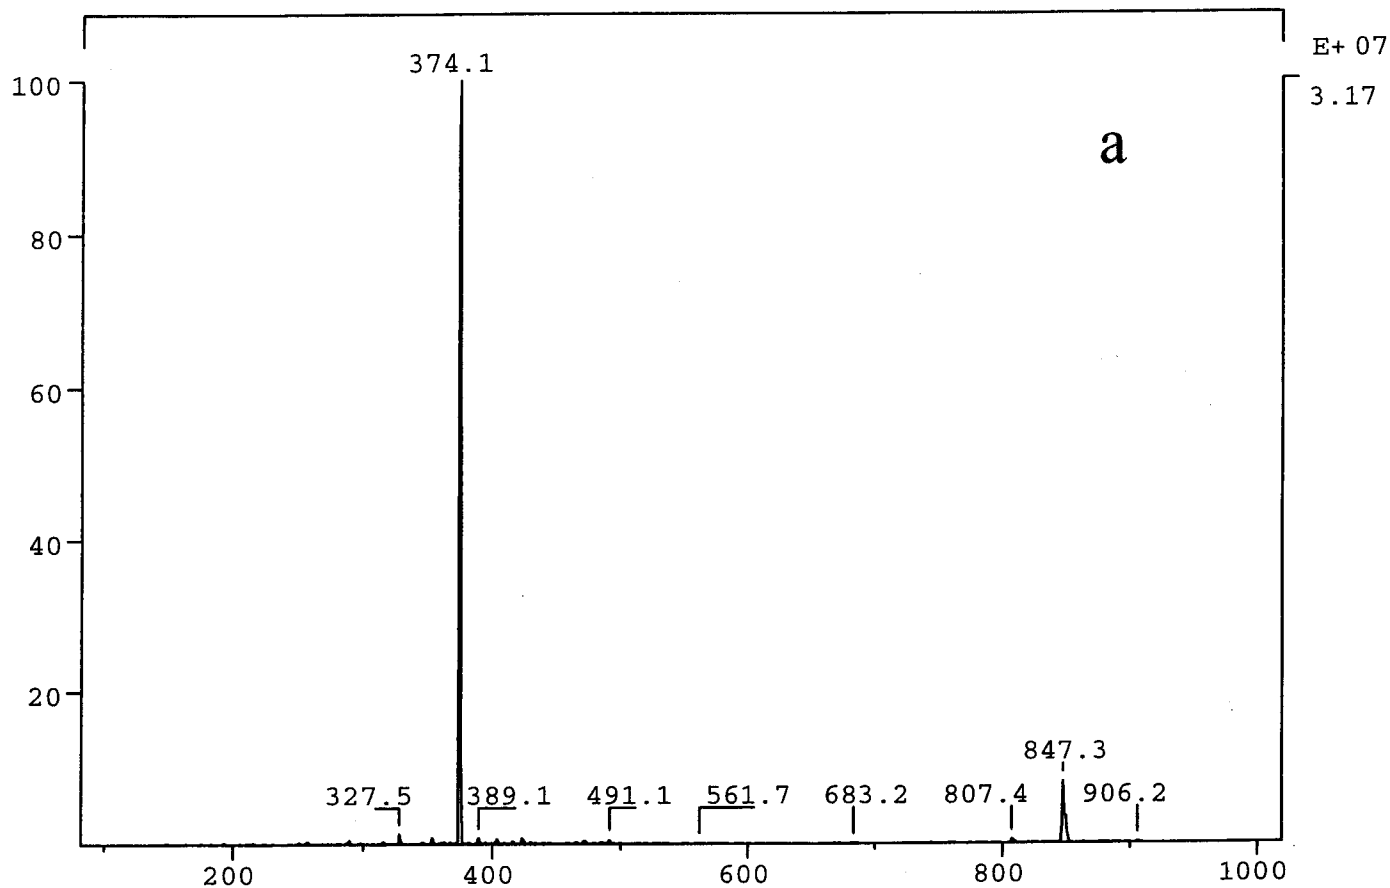

SPEC: 00052203

22-MAY-00 Elapse: 00:00:06.9

1

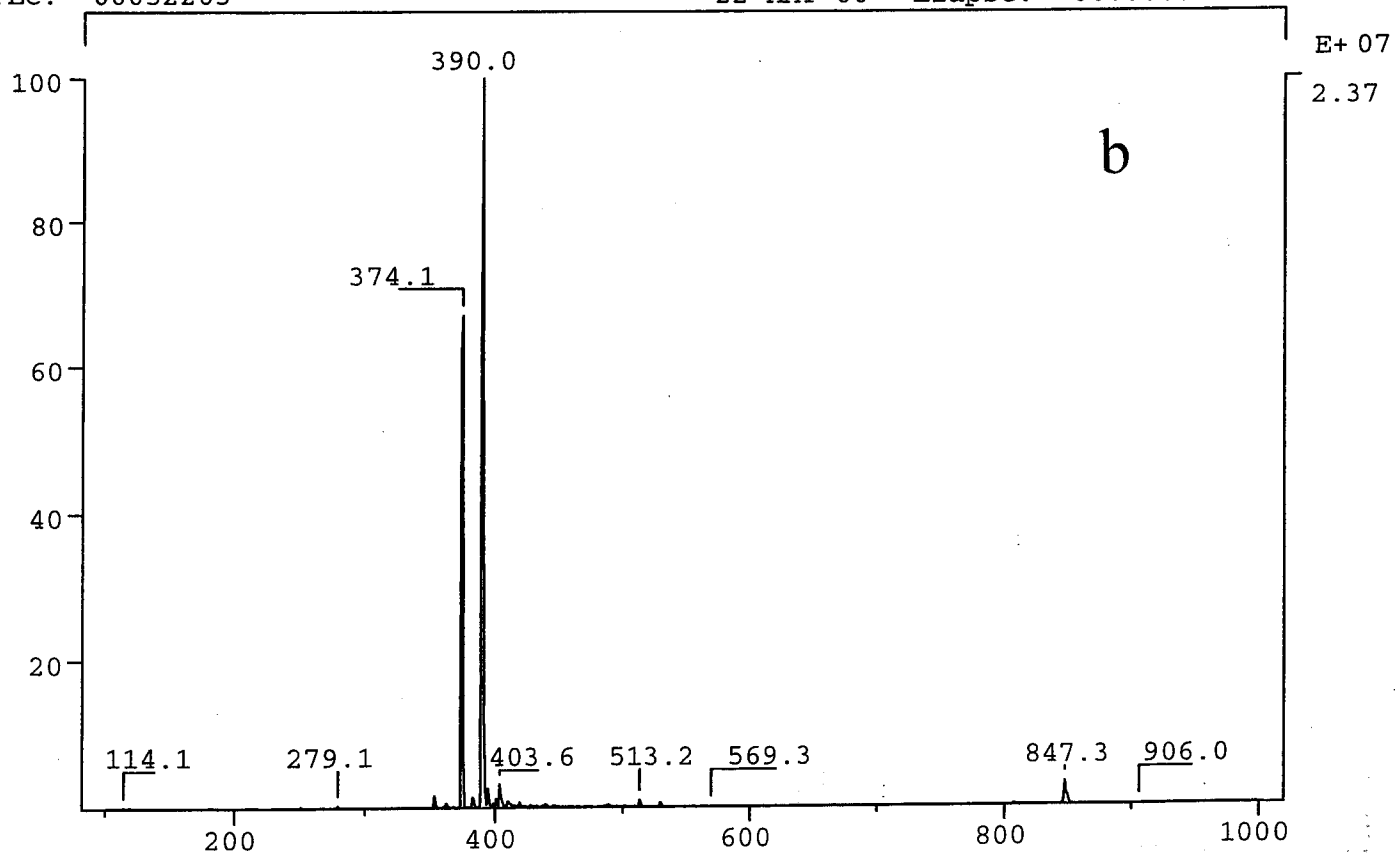

E+ 07

2.37

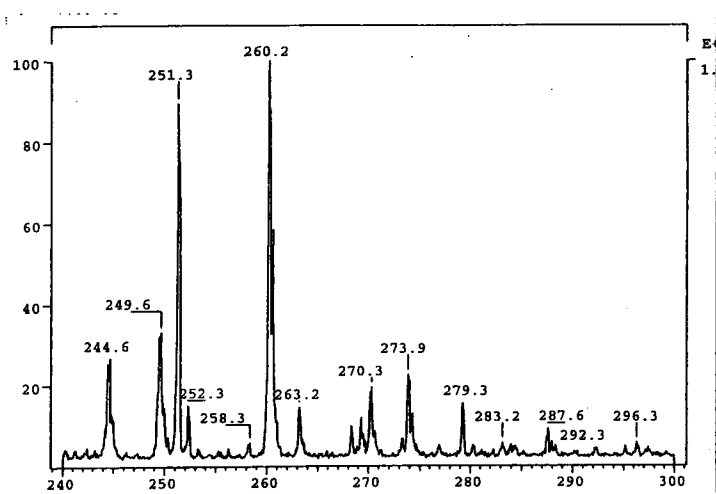

Figure S3
